# Supplementary material for: Using 3D observations with high spatio-temporal resolution to calibrate and evaluate a process-focused cellular automaton model of soil erosion by water
Source: Copernicus journal article supplement (doi:10.5194/egusphere-2024-2648), 2024-09-12

**Supplement 3-1: Scatter matrix of metrics according to different objective functions for the field experiment before filtering for unplausible models (EC in m, except sim DL that has no unit; SY in kg).**

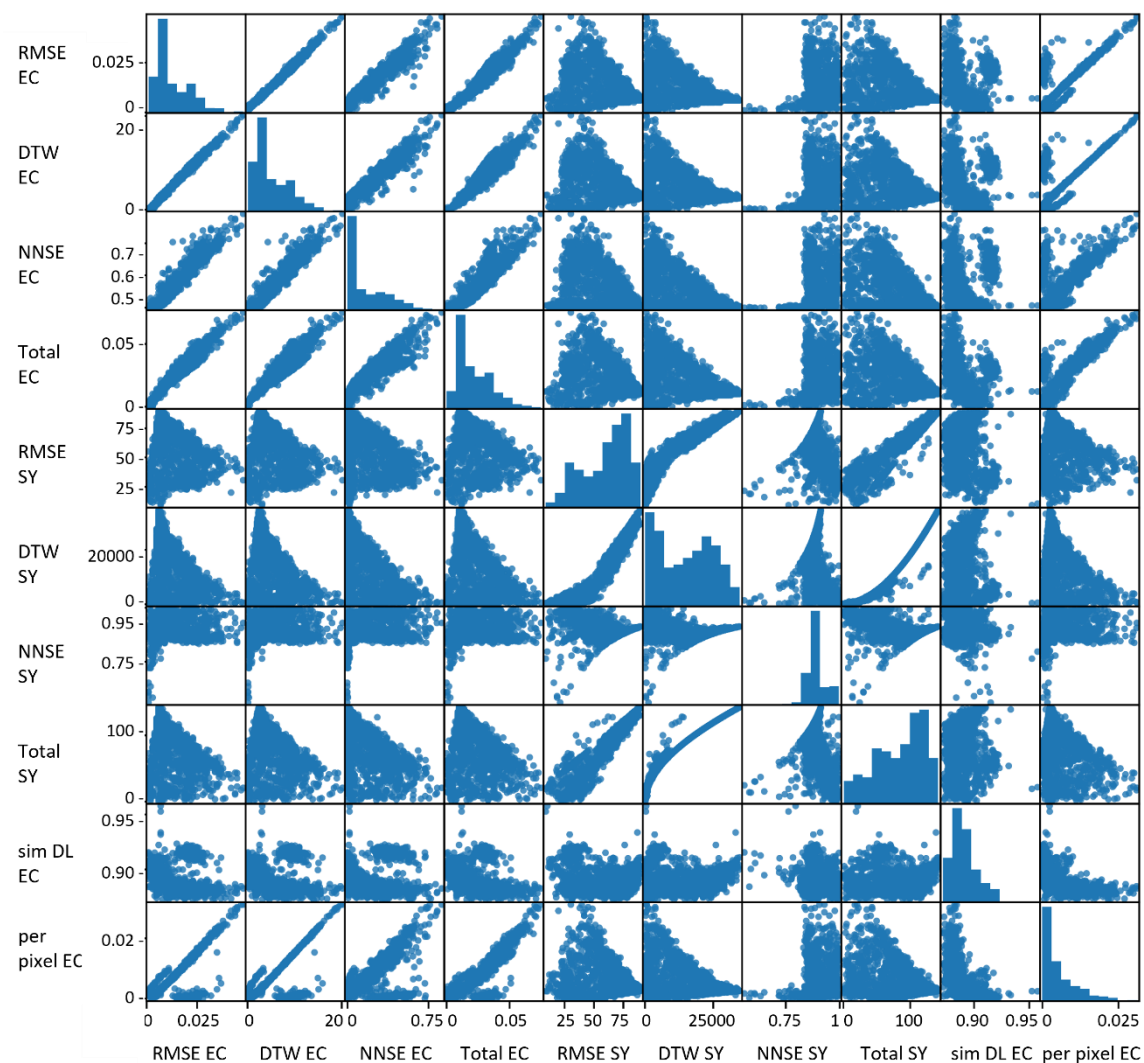

**Supplement 3-2: Scatter plot for the field experiment for the model parameter DEM base level and different metrics of the objective functions.**

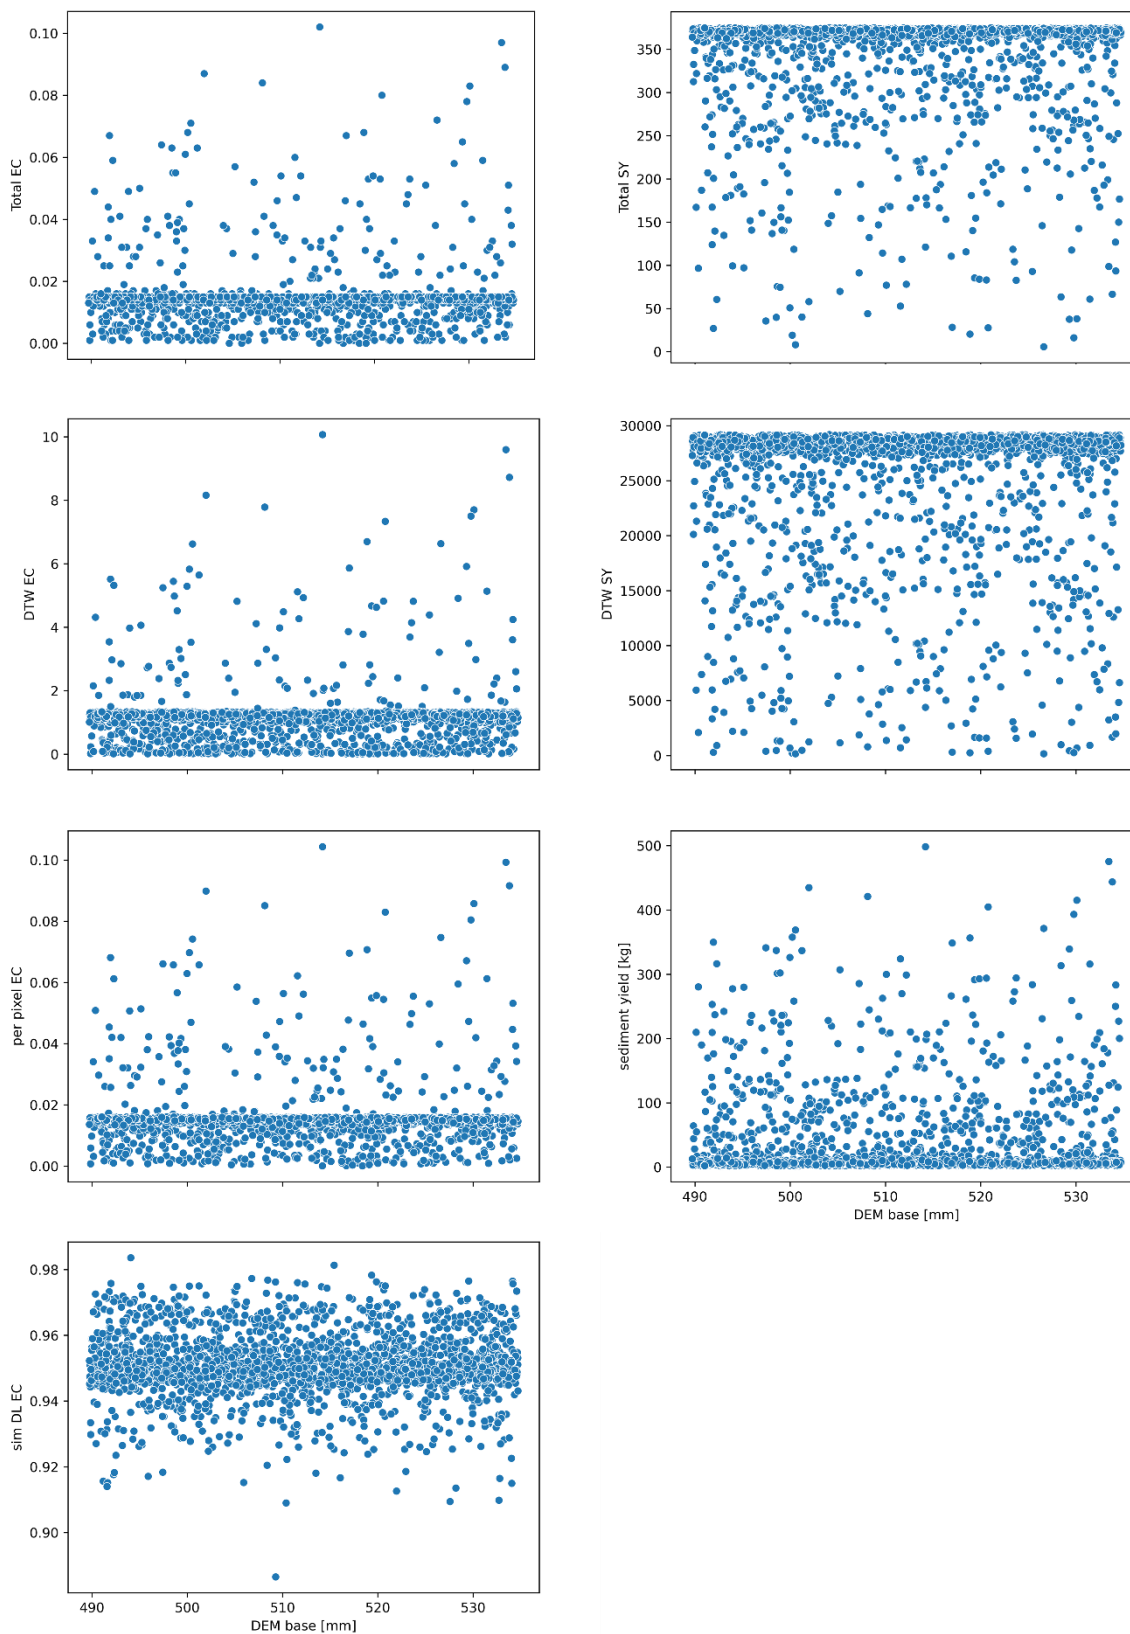

**Supplement 3-3: Scatter plot for the field experiment for the model parameter splash efficiency and different metrics of the objective functions.**

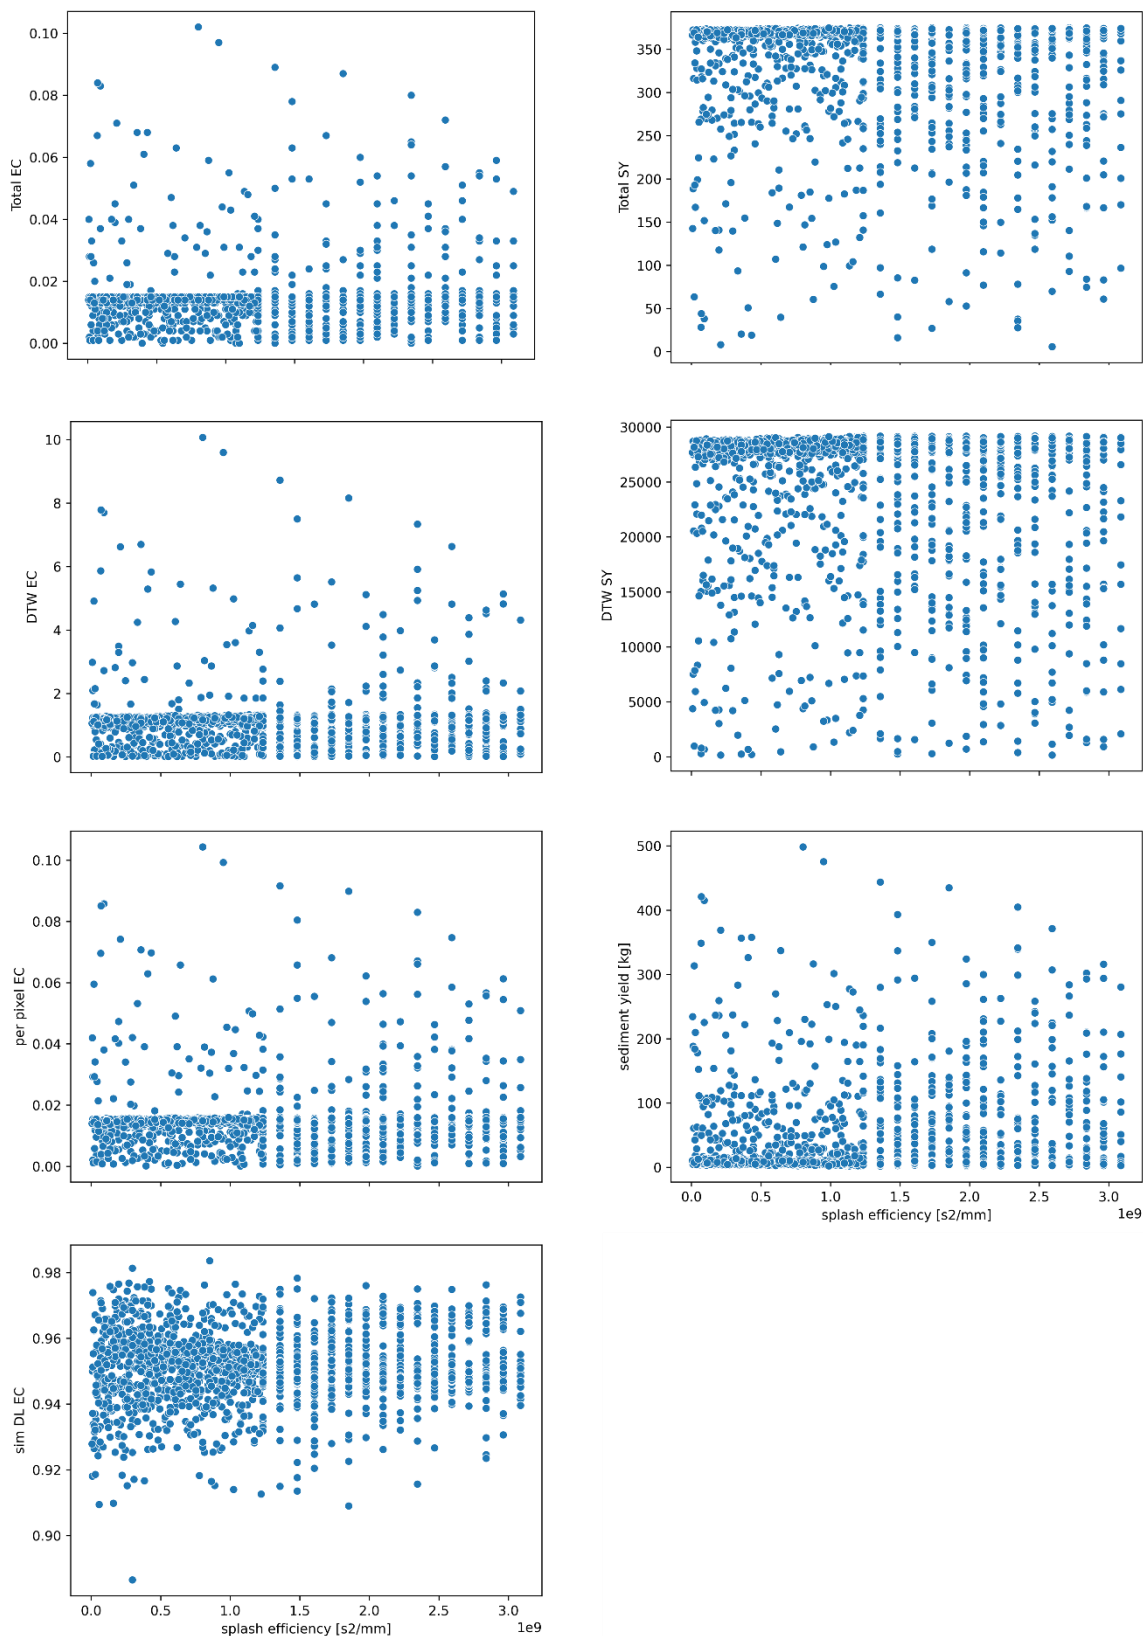

**Supplement 3-4: Scatter plot for the field experiment for the model parameter maximum flow velocity and different metrics of the objective functions.**

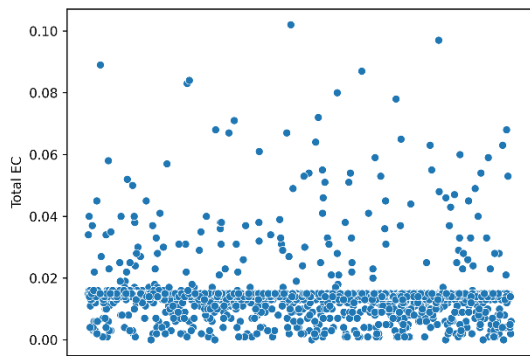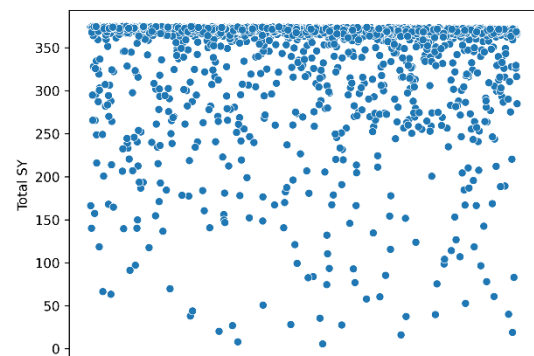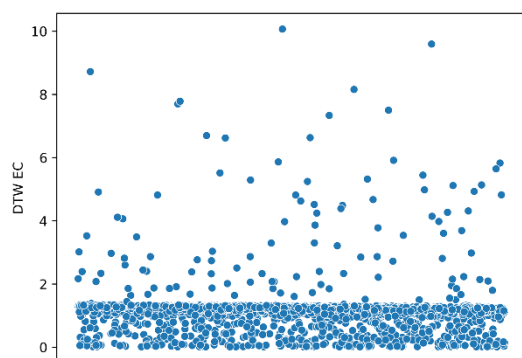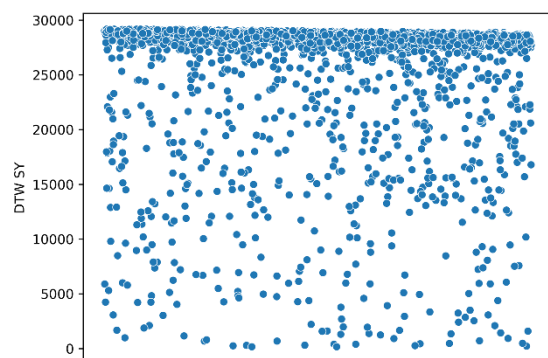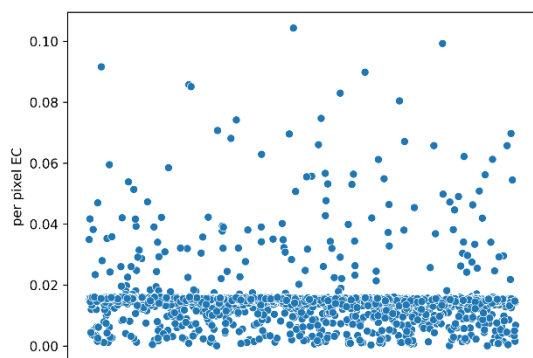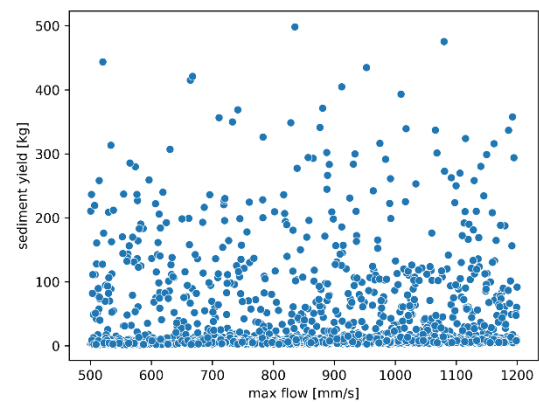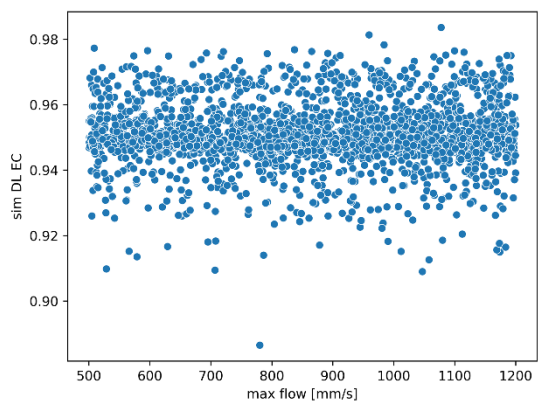

**Supplement 3-5: Scatter plot for the field experiment for the model parameter flow detachment and different metrics of the objective functions.**

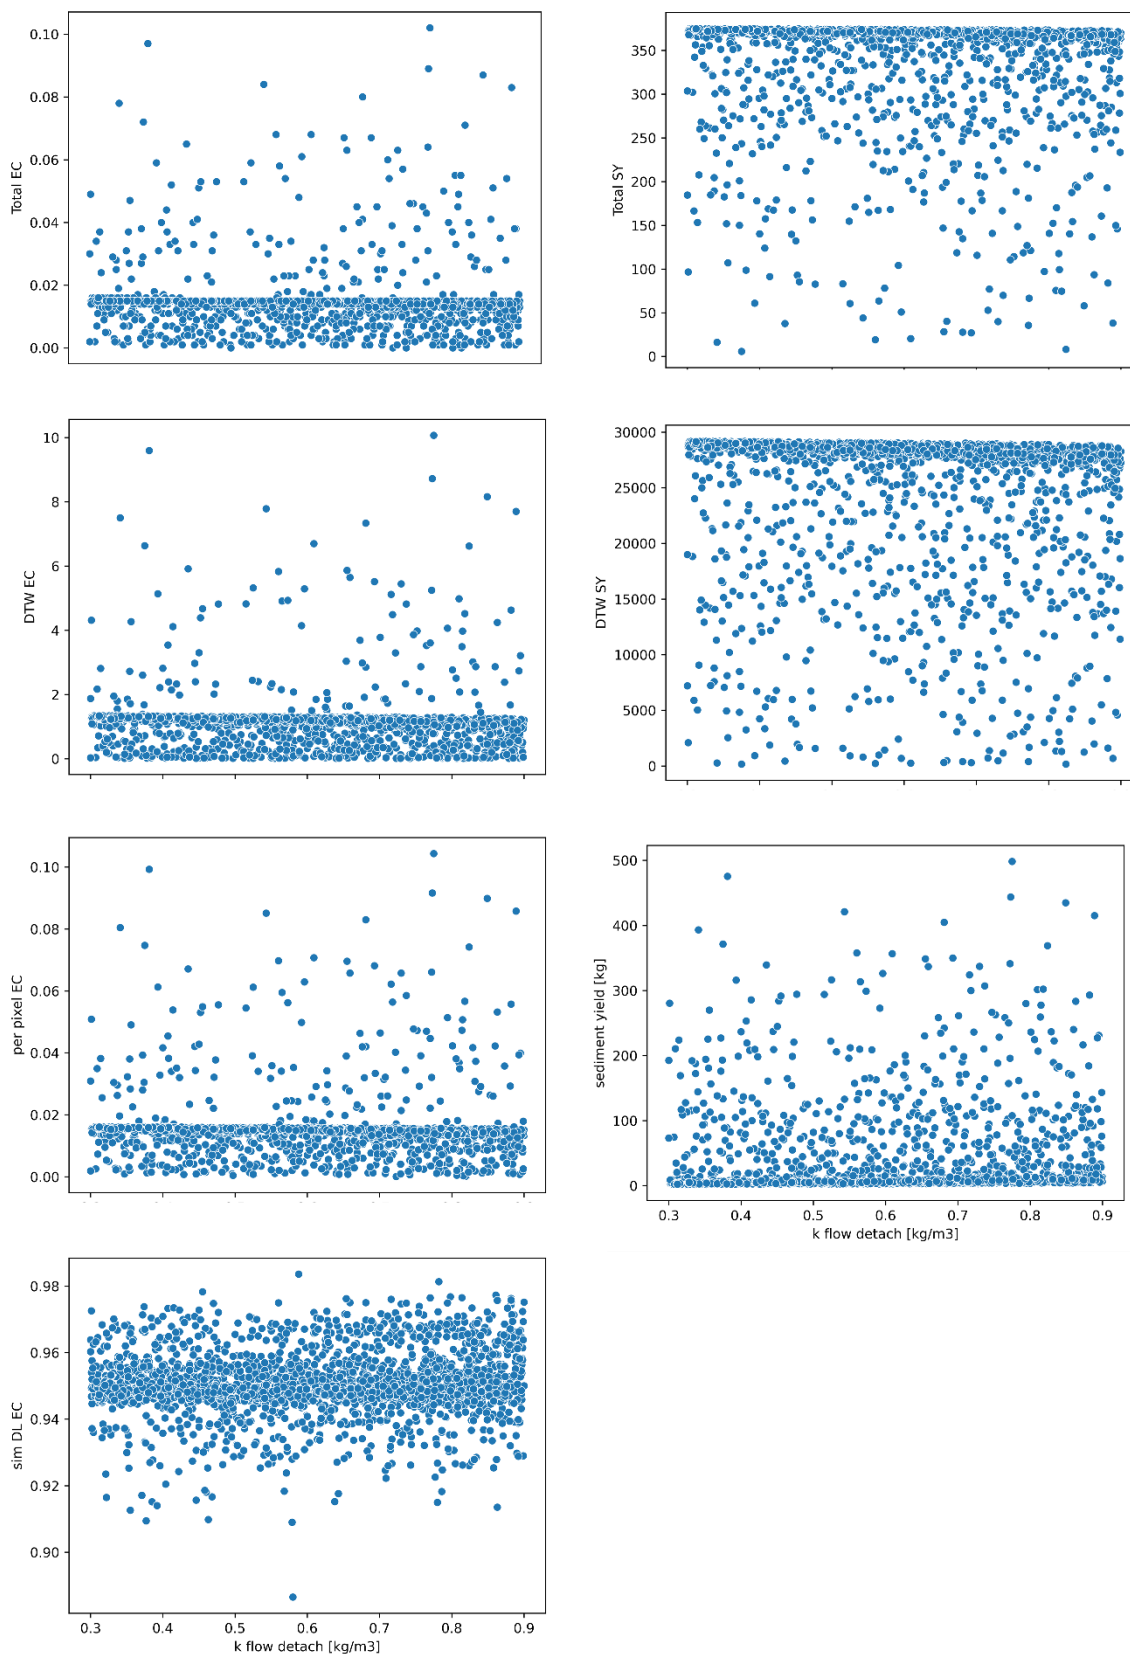



**Supplement 3-6: Scatter plot for the field experiment for the model parameter radius of soil shear stress and different metrics of the objective functions.**

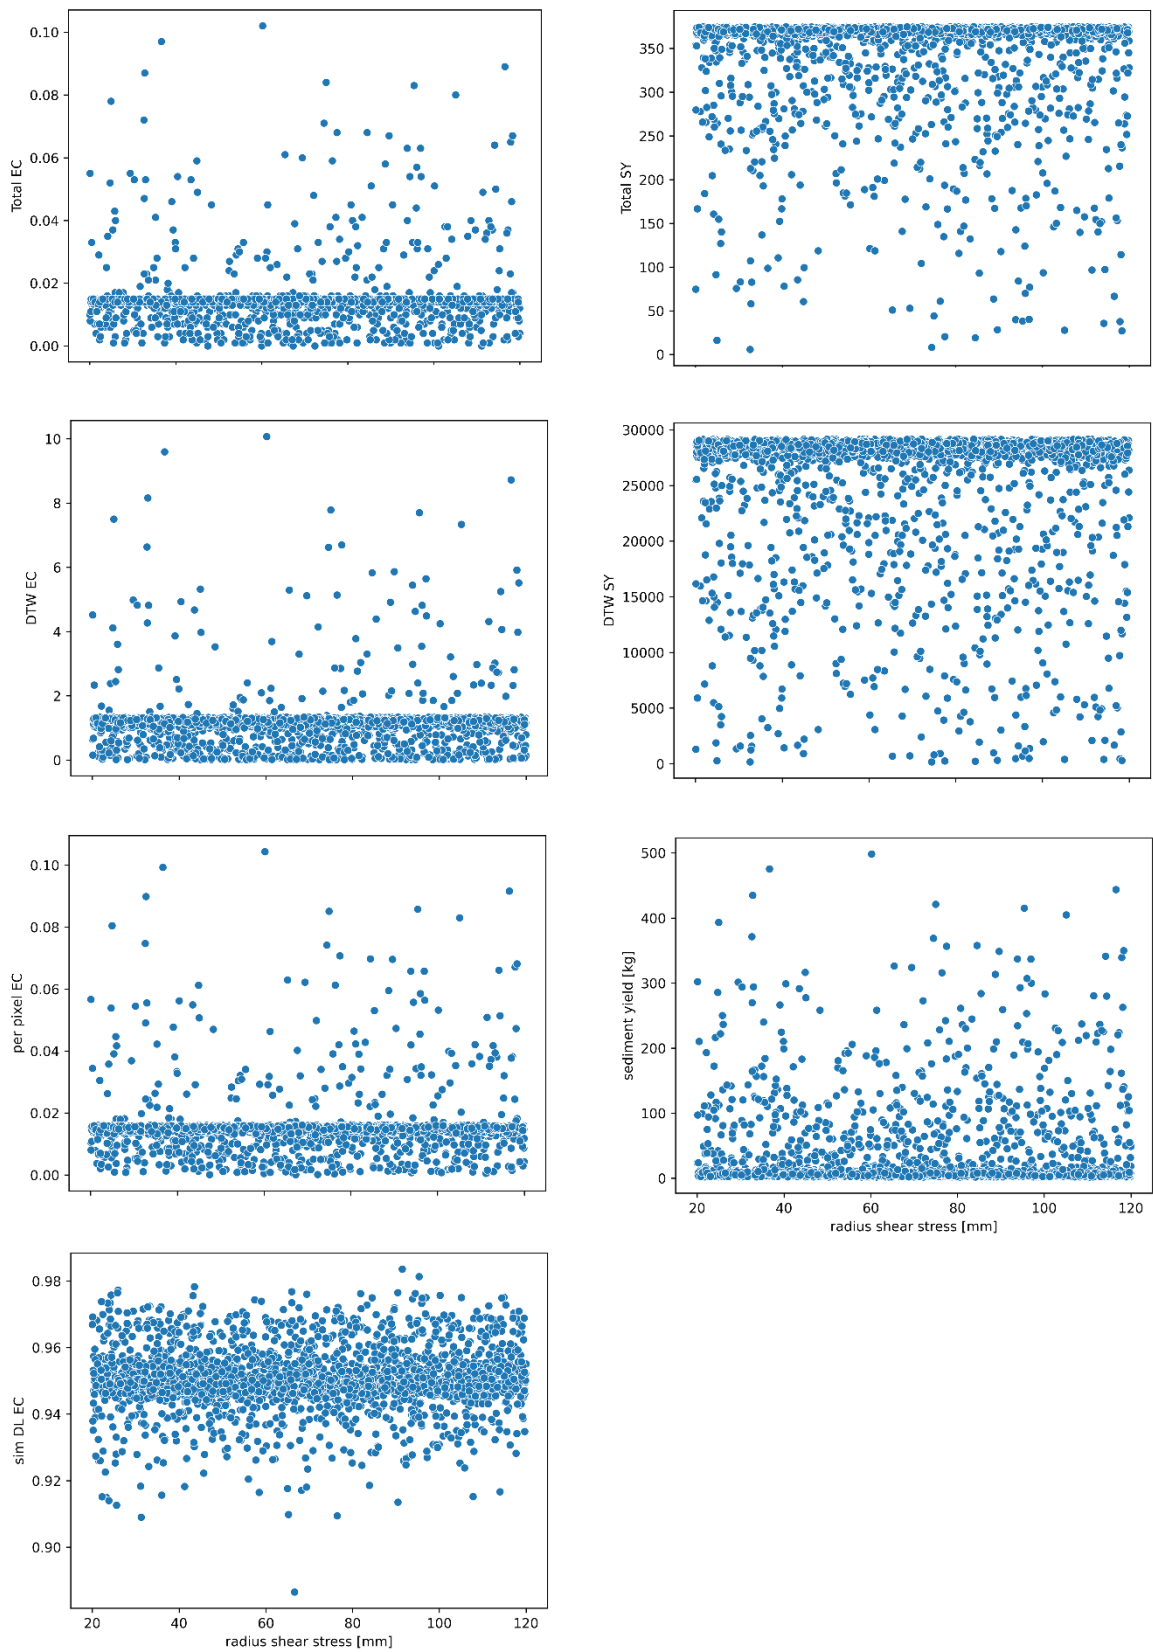

**Supplement 3-7: Scatter plot for the field experiment for the model parameter threshold shear stress for slumping and different metrics of the objective functions.**

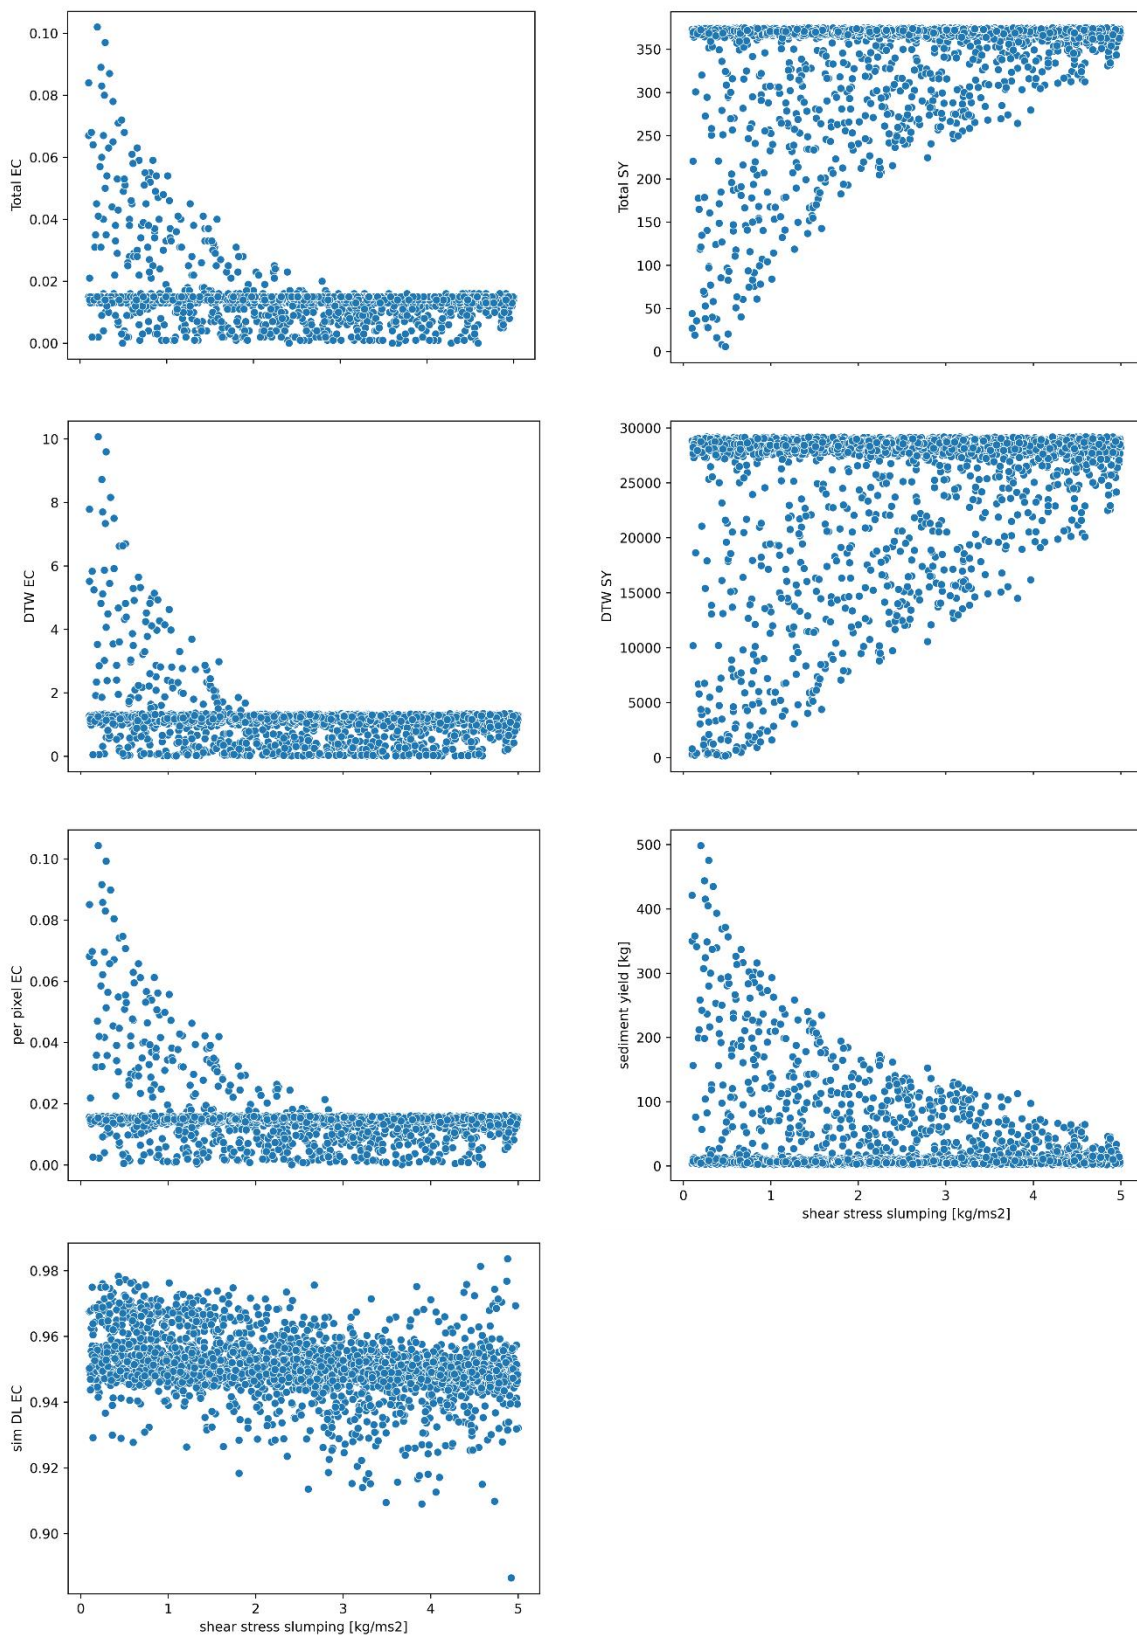

**Supplement 3-8: Scatter plot for the field experiment for the model parameter angle of rest for slumped soil and different metrics of the objective functions.**

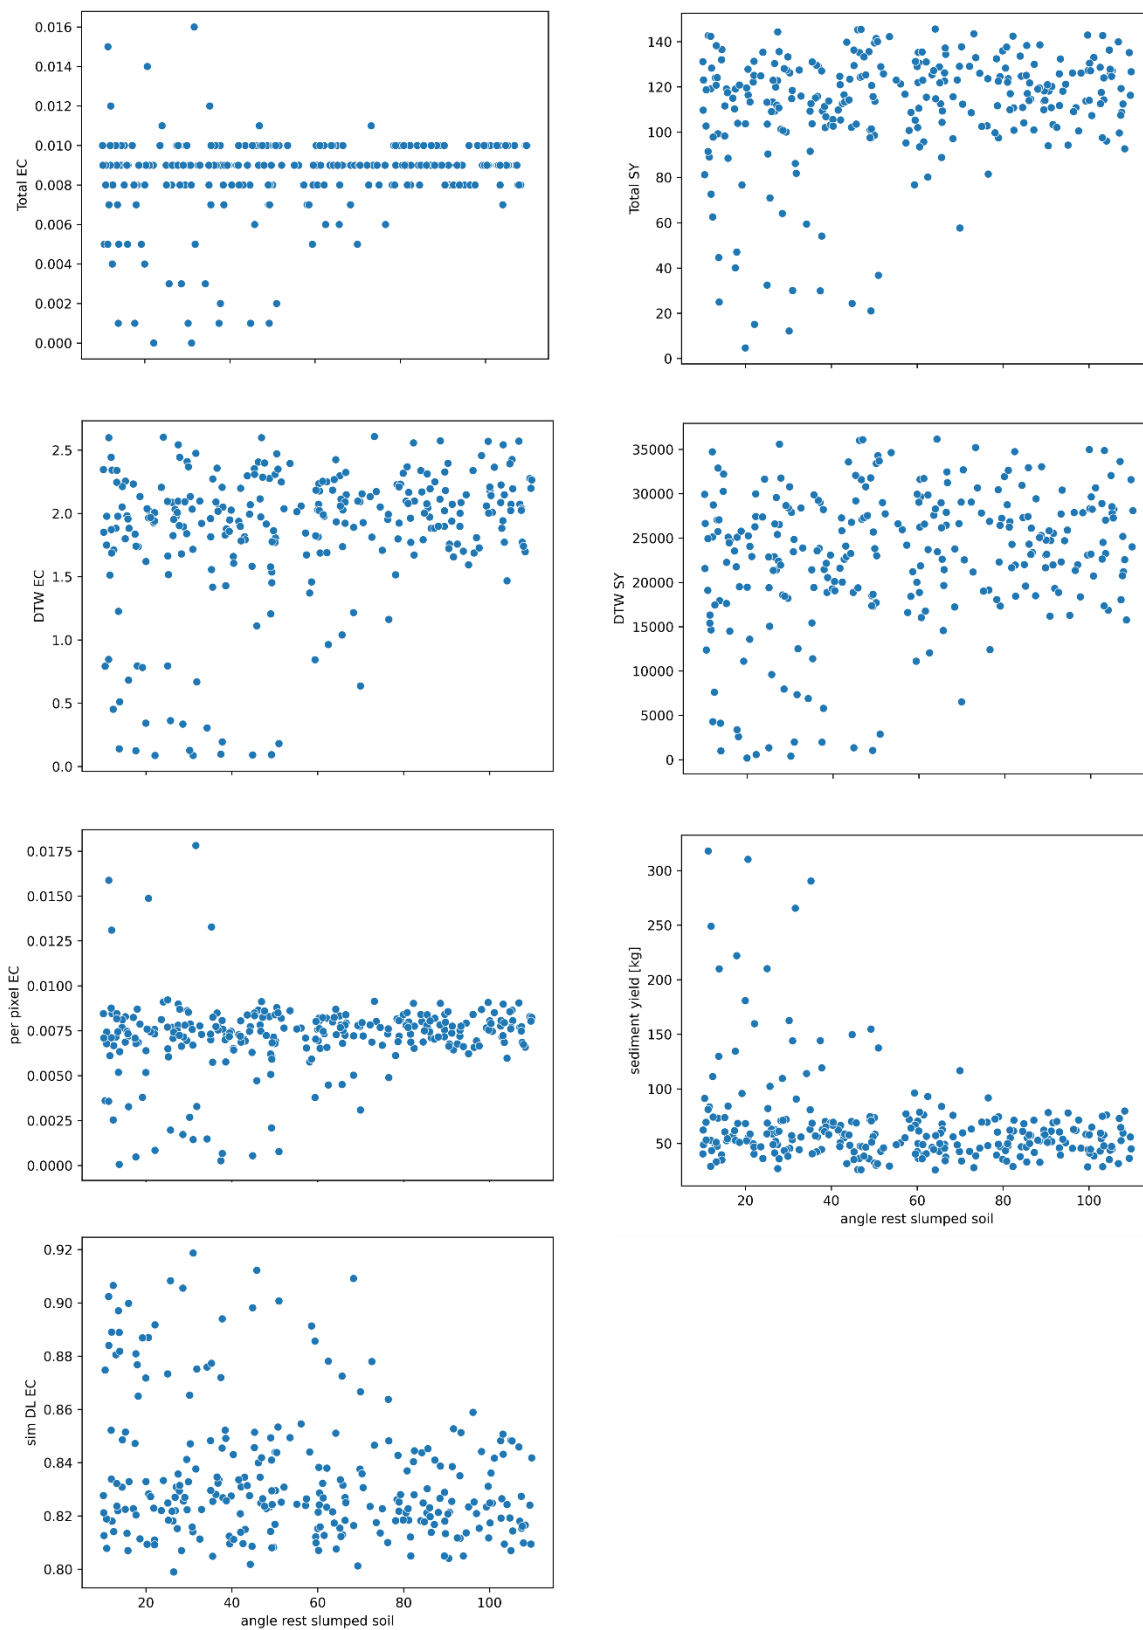



**Supplement 3-9: Scatter plot for the laboratory experiment for the model parameter DEM base level and different metrics of the objective functions.**

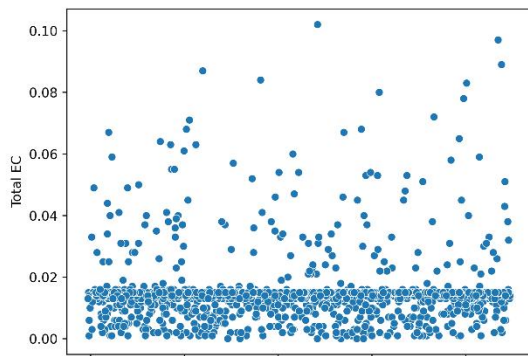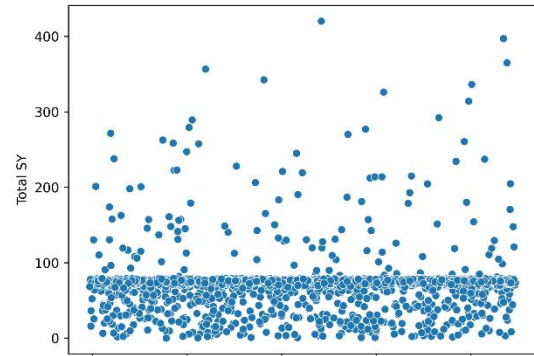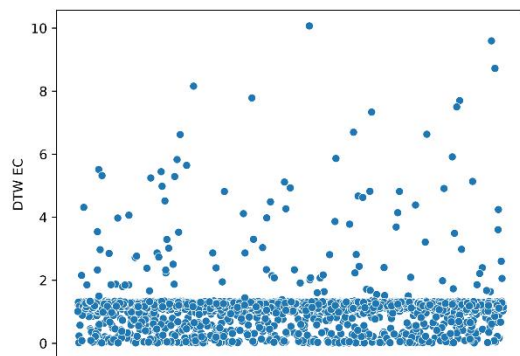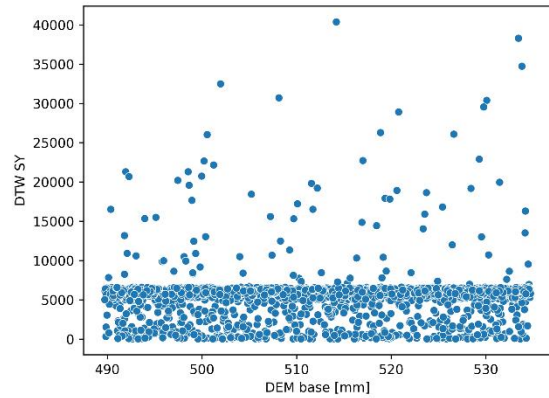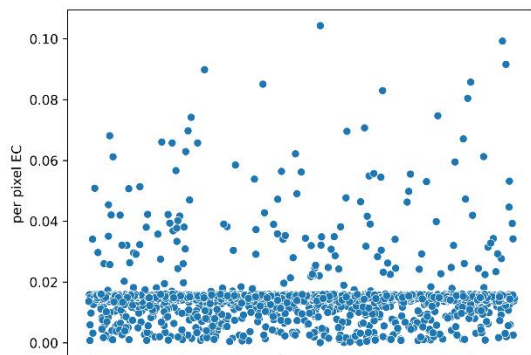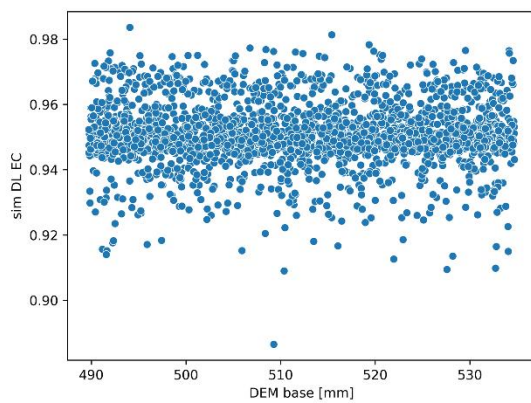

**Supplement 3-10: Scatter plot for the laboratory experiment for the model parameter splash efficiency and different metrics of the objective functions.**

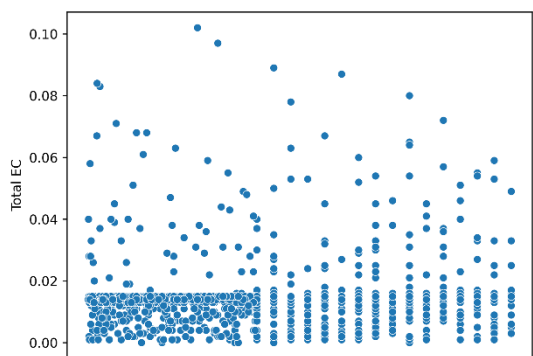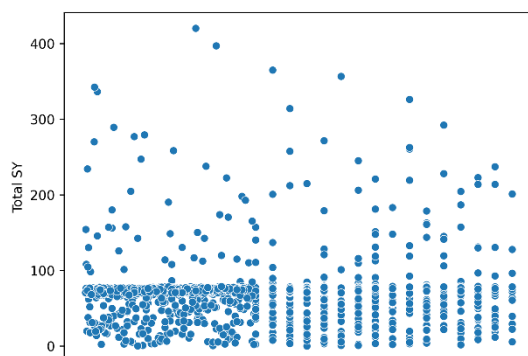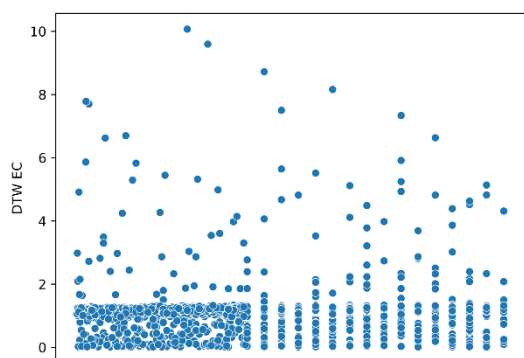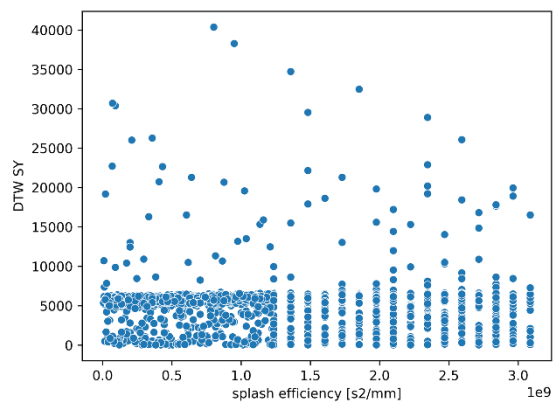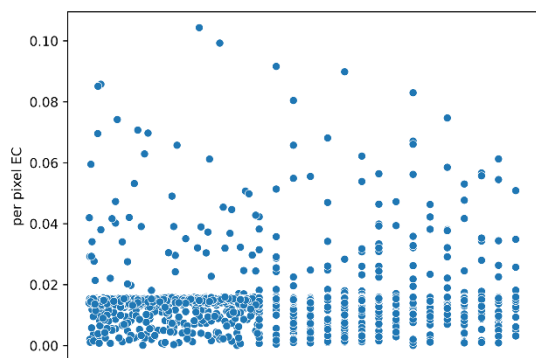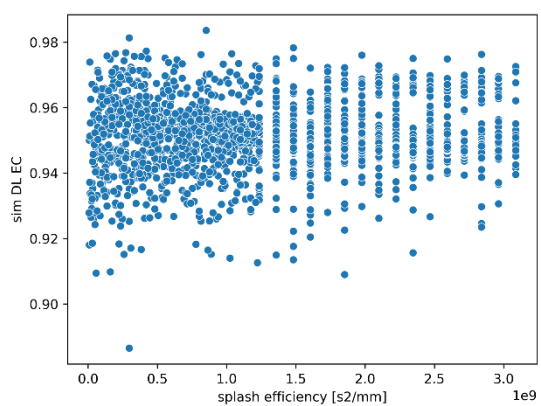

**Supplement 3-11: Scatter plot for the laboratory experiment for the model parameter maximum flow velocity and different metrics of the objective functions.**

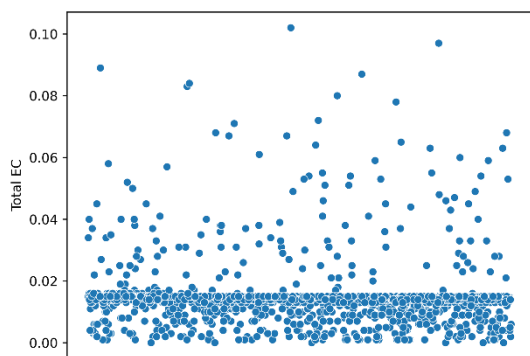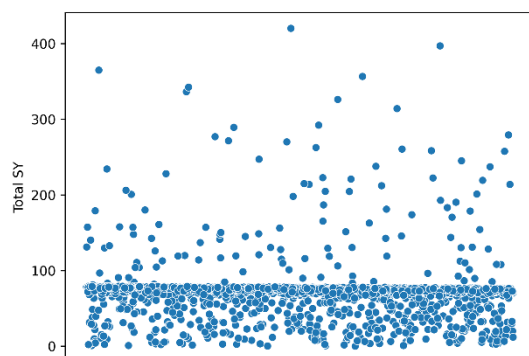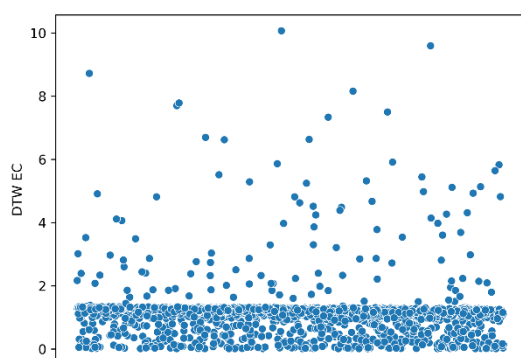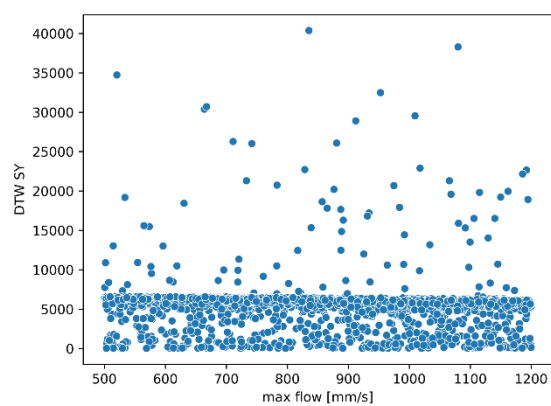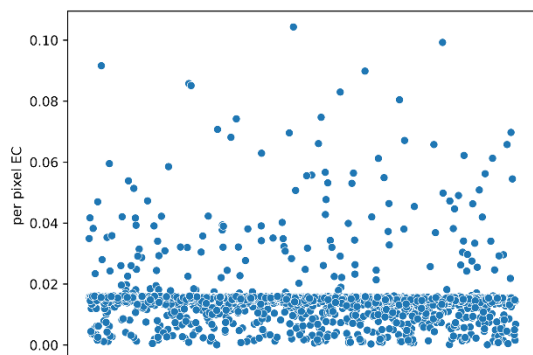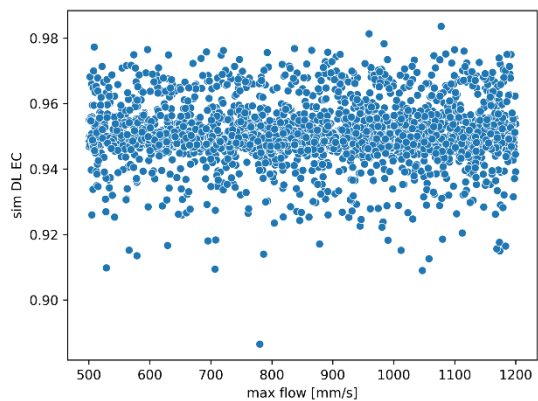

**Supplement 3-12: Scatter plot for the laboratory experiment for the model parameter flow detachment and different metrics of the objective functions.**

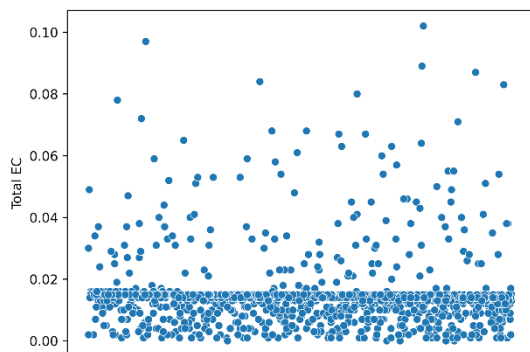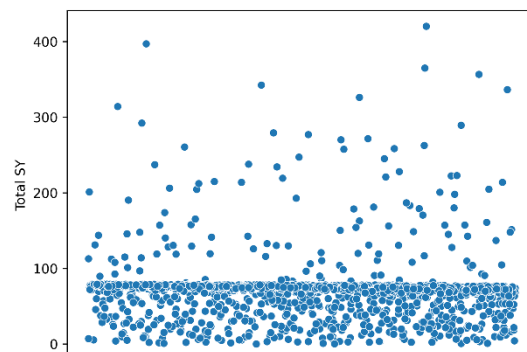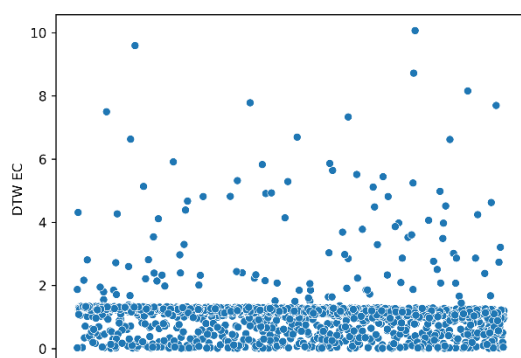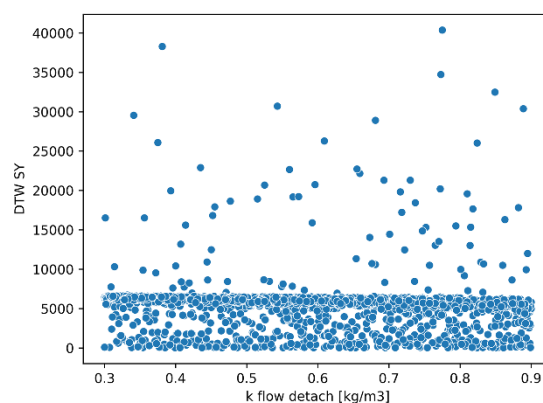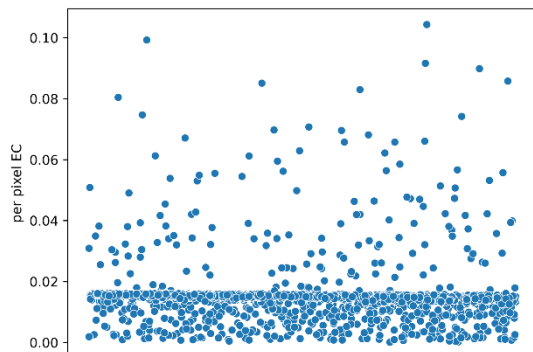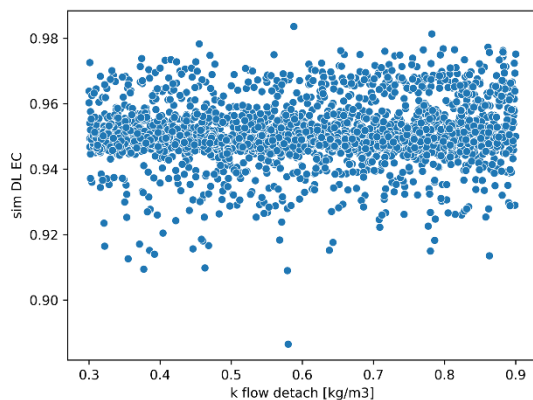

**Supplement 3-13: Scatter plot for the laboratory experiment for the model parameter radius of soil shear stress and different metrics of the objective functions.**

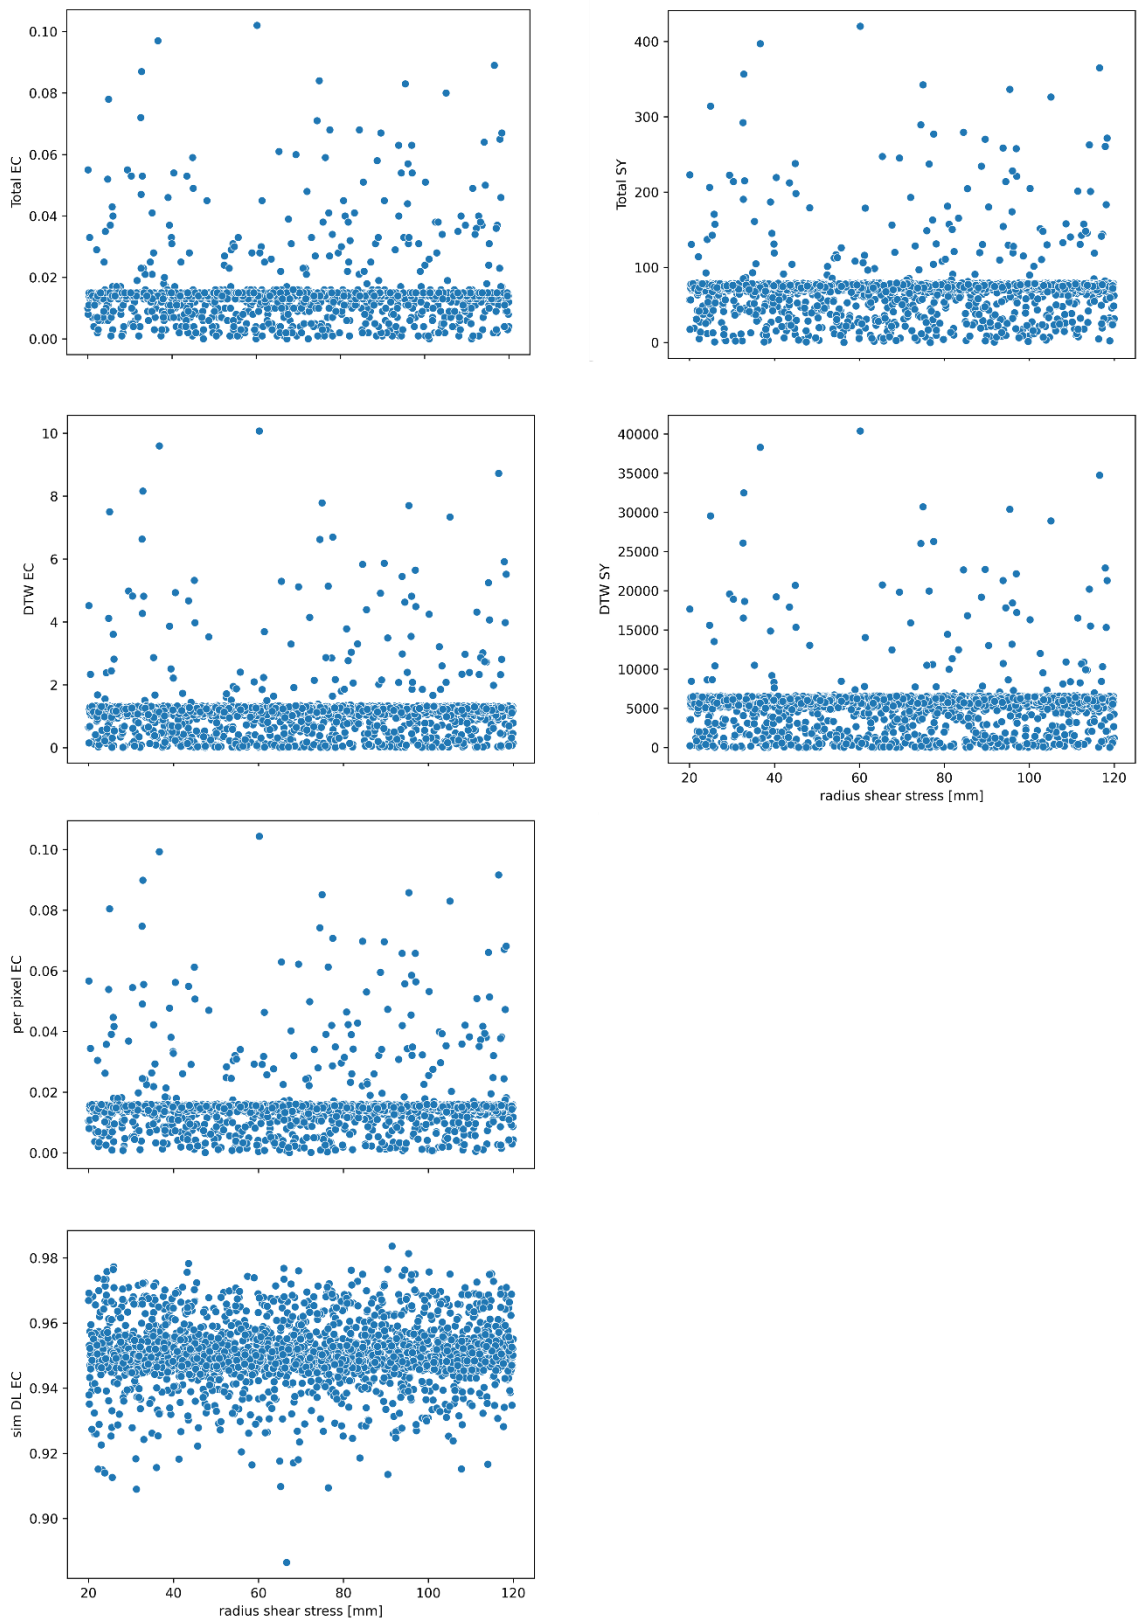



**Supplement 3-14: Scatter plot for the laboratory experiment for the model parameter threshold shear stress for slumping and different metrics of the objective functions.**

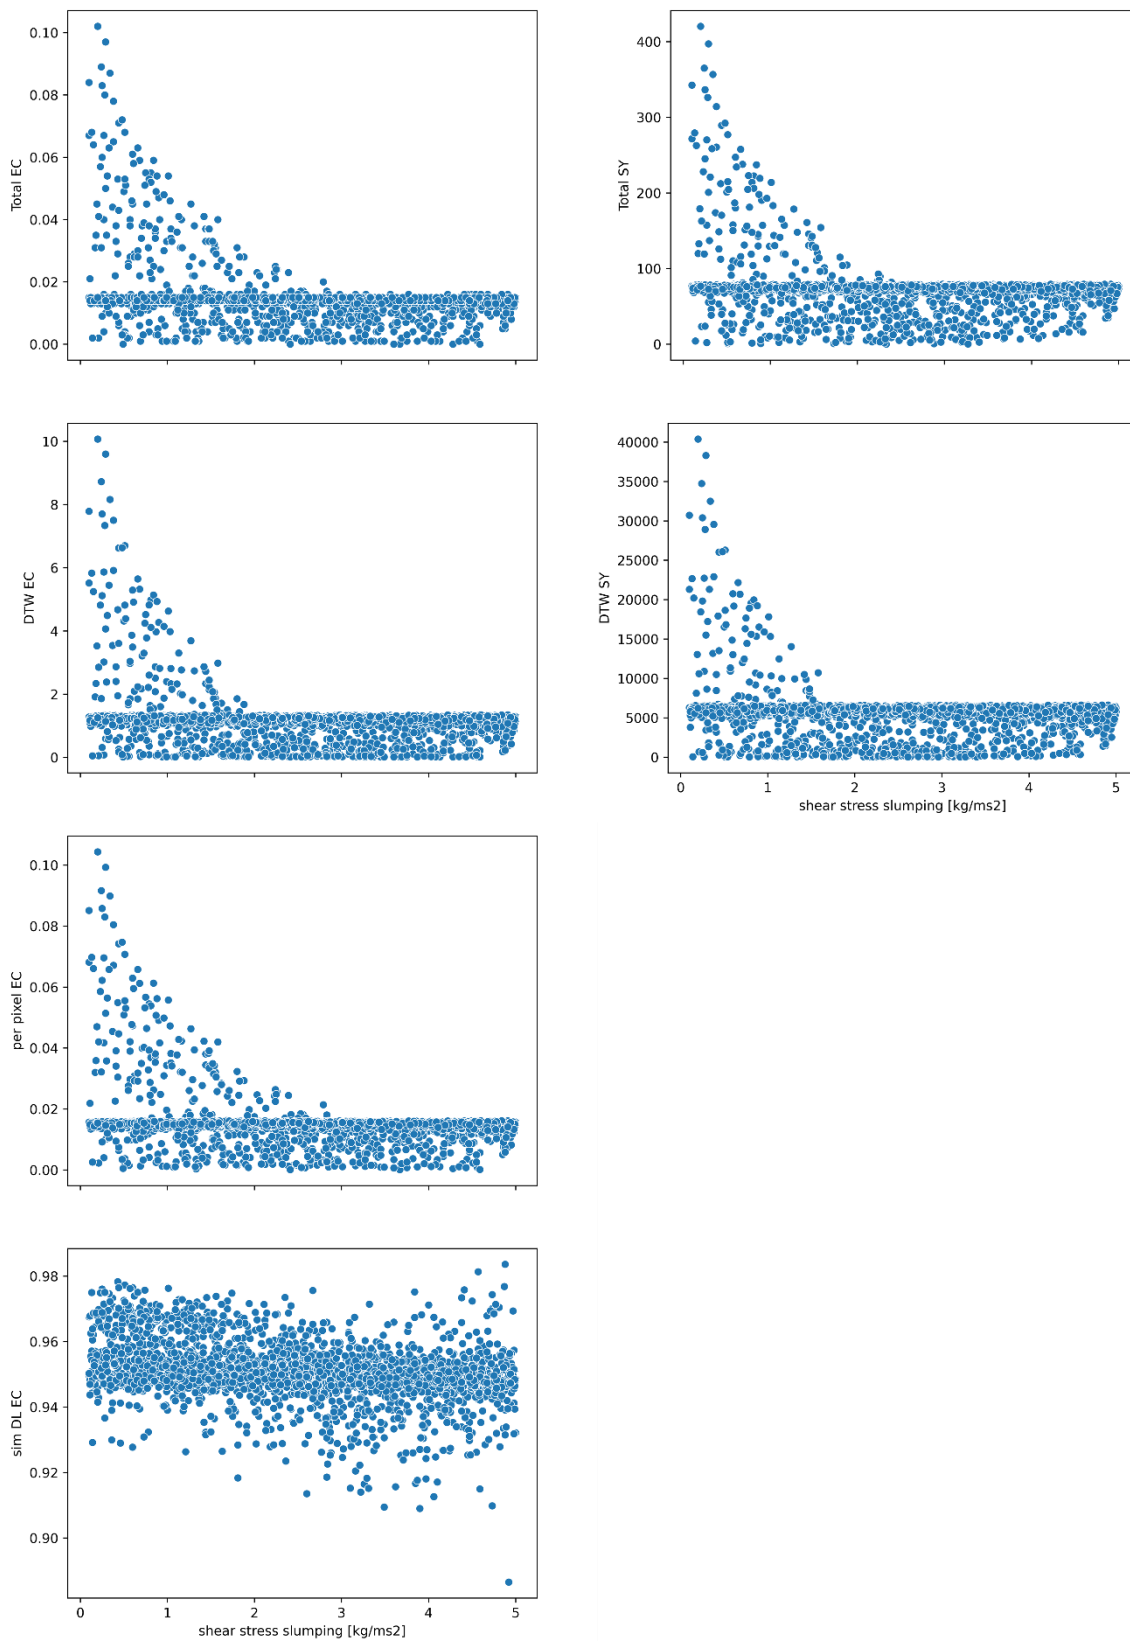

**Supplement 3-15: Scatter plot for the laboratory experiment for the model parameter angle of rest for slumped soil and different metrices of the objective functions.**

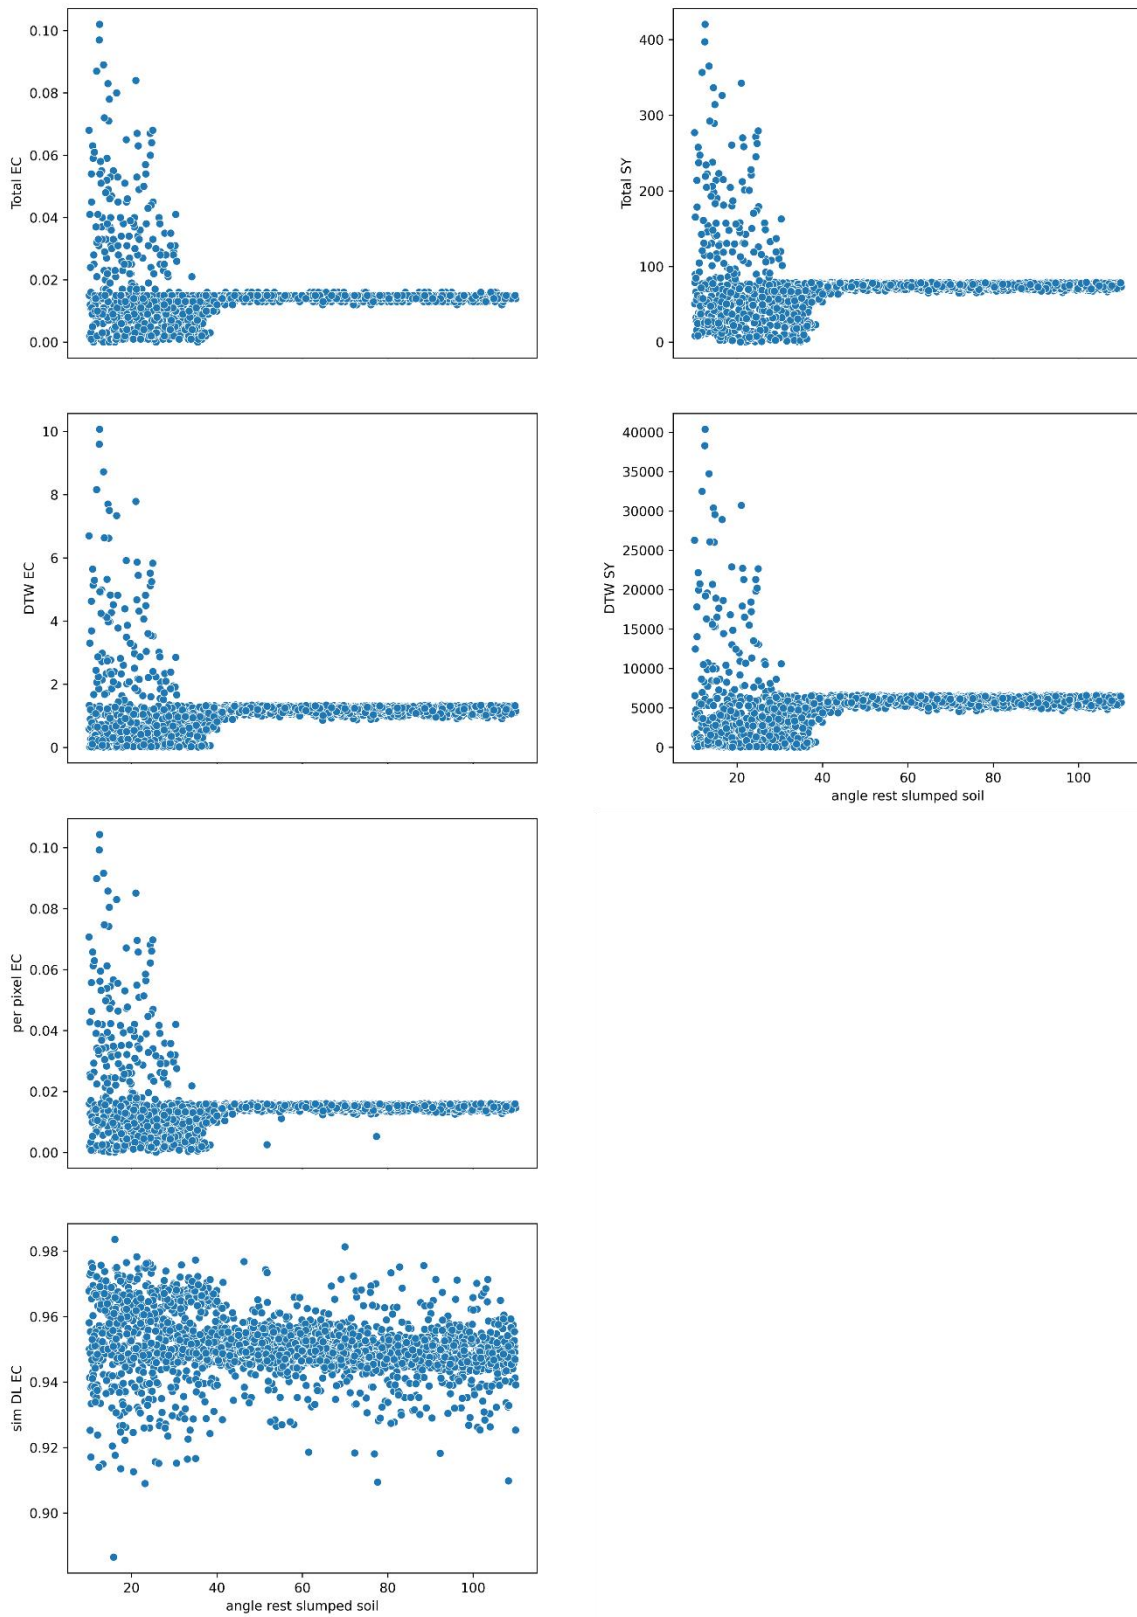

Supplement: Supplementary file 1 [file egusphere-2024-2648-supplement.zip]
